# Supplementary material
Source: publisher site journal article supplement (https://www.dovepress.com/article/489210)

**Supplementary material**

Table S1: Results of GO enrichment analysis.

|  | **ONTOLOGY** | **ID** | **Description** | **GeneRation** | **BgRation** | **pvalue** | **p.adjust** | **qvalue** | **geneID** | **Count** |
| --- | --- | --- | --- | --- | --- | --- | --- | --- | --- | --- |
| GO:0042742 | BP | GO:0042742 | defense response to bacterium | 12/27 | 364/18800 | 3.10E-14 | 3.14E-11 | 1.80E-11 | S100A12/S100A8/SLPI/IL7R/CAMP/RNASE3/OAS1/PI3/CTSG/BPI/LCN2/ELANE | 12 |
| GO:0032496 | BP | GO:0032496 | response to lipopolysaccharide | 11/27 | 333/18800 | 4.63E-13 | 2.34E-10 | 1.34E-10 | S100A8/SLPI/CAMP/CX3CR1/PRKCA/ADM/PF4/FOS/CTSG/BPI/ELANE | 11 |
| GO:0002237 | BP | GO:0002237 | response to molecule of bacterial origin | 11/27 | 354/18800 | 9.00E-13 | 3.03E-10 | 1.74E-10 | S100A8/SLPI/CAMP/CX3CR1/PRKCA/ADM/PF4/FOS/CTSG/BPI/ELANE | 11 |
| GO:0019730 | BP | GO:0019730 | antimicrobial humoral response | 8/27 | 122/18800 | 4.99E-12 | 1.26E-09 | 7.22E-10 | S100A12/SLPI/CAMP/RNASE3/PF4/PI3/CTSG/ELANE | 8 |
| GO:0019731 | BP | GO:0019731 | antibacterial humoral response | 6/27 | 60/18800 | 2.30E-10 | 4.64E-08 | 2.66E-08 | SLPI/CAMP/RNASE3/PI3/CTSG/ELANE | 6 |
| GO:0006959 | BP | GO:0006959 | humoral immune response | 9/27 | 317/18800 | 3.53E-10 | 5.95E-08 | 3.41E-08 | S100A12/SLPI/CAMP/RNASE3/PF4/CD28/PI3/CTSG/ELANE | 9 |
| GO:0050900 | BP | GO:0050900 | leukocyte migration | 9/27 | 384/18800 | 1.91E-09 | 2.76E-07 | 1.58E-07 | S100A12/S100A8/LCK/MMP9/CX3CR1/IL1R1/PF4/CTSG/ELANE | 9 |
| GO:0050832 | BP | GO:0050832 | defense response to fungus | 5/27 | 53/18800 | 1.13E-08 | 1.43E-06 | 8.18E-07 | S100A12/S100A8/CX3CR1/CTSG/ELANE | 5 |
| GO:0009620 | BP | GO:0009620 | response to fungus | 5/27 | 64/18800 | 2.97E-08 | 3.34E-06 | 1.91E-06 | S100A12/S100A8/CX3CR1/CTSG/ELANE | 5 |
| GO:0007159 | BP | GO:0007159 | leukocyte cell-cell adhesion | 8/27 | 381/18800 | 4.19E-08 | 4.24E-06 | 2.43E-06 | S100A8/LCK/IL7R/CX3CR1/CD28/CTSG/CD40LG/ELANE | 8 |
| GO:0061844 | BP | GO:0061844 | antimicrobial humoral immune response mediated by antimicrobial peptide | 5/27 | 79/18800 | 8.65E-08 | 7.59E-06 | 4.35E-06 | S100A12/CAMP/RNASE3/PF4/ELANE | 5 |
| GO:0051873 | BP | GO:0051873 | killing by host of symbiont cells | 4/27 | 30/18800 | 9.01E-08 | 7.59E-06 | 4.35E-06 | CAMP/PF4/CTSG/ELANE | 4 |
| GO:0050829 | BP | GO:0050829 | defense response to Gram-negative bacterium | 5/27 | 87/18800 | 1.41E-07 | 1.09E-05 | 6.27E-06 | CAMP/RNASE3/CTSG/BPI/ELANE | 5 |
| GO:0019221 | BP | GO:0019221 | cytokine-mediated signaling pathway | 8/27 | 486/18800 | 2.71E-07 | 1.96E-05 | 1.12E-05 | IL7R/IL2RB/CX3CR1/IL1R2/IL1R1/PF4/OAS1/CTSG | 8 |
| GO:0051702 | BP | GO:0051702 | biological process involved in interaction with symbiont | 5/27 | 101/18800 | 2.98E-07 | 2.01E-05 | 1.15E-05 | CAMP/CX3CR1/PF4/CTSG/ELANE | 5 |
| GO:0071222 | BP | GO:0071222 | cellular response to lipopolysaccharide | 6/27 | 217/18800 | 5.34E-07 | 3.37E-05 | 1.93E-05 | CAMP/CX3CR1/PRKCA/PF4/CTSG/BPI | 6 |
| GO:0071219 | BP | GO:0071219 | cellular response to molecule of bacterial origin | 6/27 | 229/18800 | 7.31E-07 | 4.11E-05 | 2.35E-05 | CAMP/CX3CR1/PRKCA/PF4/CTSG/BPI | 6 |
| GO:0097529 | BP | GO:0097529 | myeloid leukocyte migration | 6/27 | 229/18800 | 7.31E-07 | 4.11E-05 | 2.35E-05 | S100A12/S100A8/CX3CR1/IL1R1/PF4/CTSG | 6 |
| GO:0030168 | BP | GO:0030168 | platelet activation | 5/27 | 130/18800 | 1.05E-06 | 5.56E-05 | 3.19E-05 | LCK/PRKCA/PF4/CTSG/CD40LG | 5 |
| GO:0071216 | BP | GO:0071216 | cellular response to biotic stimulus | 6/27 | 256/18800 | 1.40E-06 | 7.08E-05 | 4.05E-05 | CAMP/CX3CR1/PRKCA/PF4/CTSG/BPI | 6 |
| GO:0045785 | BP | GO:0045785 | positive regulation of cell adhesion | 7/27 | 446/18800 | 2.38E-06 | 0.000114356 | 6.55E-05 | LCK/IL7R/PRKCA/CD28/CTSG/CD40LG/ELANE | 7 |
| GO:0022407 | BP | GO:0022407 | regulation of cell-cell adhesion | 7/27 | 456/18800 | 2.75E-06 | 0.000122688 | 7.03E-05 | LCK/IL7R/PRKCA/CD28/CTSG/CD40LG/ELANE | 7 |
| GO:0002443 | BP | GO:0002443 | leukocyte mediated immunity | 7/27 | 457/18800 | 2.79E-06 | 0.000122688 | 7.03E-05 | IL7R/CX3CR1/IL1R1/CD28/CTSG/CD40LG/ELANE | 7 |
| GO:0022409 | BP | GO:0022409 | positive regulation of cell-cell adhesion | 6/27 | 291/18800 | 2.94E-06 | 0.000123889 | 7.09E-05 | LCK/IL7R/CD28/CTSG/CD40LG/ELANE | 6 |
| GO:0001819 | BP | GO:0001819 | positive regulation of cytokine production | 7/27 | 475/18800 | 3.60E-06 | 0.000145682 | 8.34E-05 | ORM1/IL1R1/PF4/CD28/OAS1/CD40LG/ELANE | 7 |
| GO:0032640 | BP | GO:0032640 | tumor necrosis factor production | 5/27 | 182/18800 | 5.47E-06 | 0.000204657 | 0.000117197 | ORM1/CX3CR1/PF4/OAS1/BPI | 5 |
| GO:0032680 | BP | GO:0032680 | regulation of tumor necrosis factor production | 5/27 | 182/18800 | 5.47E-06 | 0.000204657 | 0.000117197 | ORM1/CX3CR1/PF4/OAS1/BPI | 5 |
| GO:0001906 | BP | GO:0001906 | cell killing | 5/27 | 185/18800 | 5.92E-06 | 0.000210205 | 0.000120374 | S100A12/IL7R/CX3CR1/CTSG/ELANE | 5 |
| GO:0071706 | BP | GO:0071706 | tumor necrosis factor superfamily cytokine production | 5/27 | 187/18800 | 6.24E-06 | 0.000210205 | 0.000120374 | ORM1/CX3CR1/PF4/OAS1/BPI | 5 |
| GO:1903555 | BP | GO:1903555 | regulation of tumor necrosis factor superfamily cytokine production | 5/27 | 187/18800 | 6.24E-06 | 0.000210205 | 0.000120374 | ORM1/CX3CR1/PF4/OAS1/BPI | 5 |
| GO:1903037 | BP | GO:1903037 | regulation of leukocyte cell-cell adhesion | 6/27 | 344/18800 | 7.69E-06 | 0.000250686 | 0.000143555 | LCK/IL7R/CD28/CTSG/CD40LG/ELANE | 6 |
| GO:0001818 | BP | GO:0001818 | negative regulation of cytokine production | 6/27 | 363/18800 | 1.04E-05 | 0.000329956 | 0.000188949 | ORM1/CX3CR1/IL1R2/OAS1/BPI/ELANE | 6 |
| GO:0050878 | BP | GO:0050878 | regulation of body fluid levels | 6/27 | 382/18800 | 1.40E-05 | 0.000406179 | 0.000232598 | LCK/PRKCA/ADM/PF4/CTSG/CD40LG | 6 |
| GO:0007596 | BP | GO:0007596 | blood coagulation | 5/27 | 221/18800 | 1.40E-05 | 0.000406179 | 0.000232598 | LCK/PRKCA/PF4/CTSG/CD40LG | 5 |
| GO:0050830 | BP | GO:0050830 | defense response to Gram-positive bacterium | 4/27 | 104/18800 | 1.41E-05 | 0.000406179 | 0.000232598 | IL7R/CAMP/RNASE3/CTSG | 4 |
| GO:0050817 | BP | GO:0050817 | coagulation | 5/27 | 226/18800 | 1.56E-05 | 0.000436141 | 0.000249755 | LCK/PRKCA/PF4/CTSG/CD40LG | 5 |
| GO:0007599 | BP | GO:0007599 | hemostasis | 5/27 | 227/18800 | 1.60E-05 | 0.000436141 | 0.000249755 | LCK/PRKCA/PF4/CTSG/CD40LG | 5 |
| GO:0050727 | BP | GO:0050727 | regulation of inflammatory response | 6/27 | 394/18800 | 1.66E-05 | 0.000442345 | 0.000253308 | S100A12/S100A8/MMP9/IL1R1/CD28/ELANE | 6 |
| GO:0002274 | BP | GO:0002274 | myeloid leukocyte activation | 5/27 | 232/18800 | 1.77E-05 | 0.000459584 | 0.00026318 | S100A12/CAMP/CX3CR1/CTSG/BPI | 5 |
| GO:0030595 | BP | GO:0030595 | leukocyte chemotaxis | 5/27 | 236/18800 | 1.92E-05 | 0.00048653 | 0.000278611 | S100A12/S100A8/CX3CR1/PF4/CTSG | 5 |
| GO:1903039 | BP | GO:1903039 | positive regulation of leukocyte cell-cell adhesion | 5/27 | 245/18800 | 2.30E-05 | 0.000568213 | 0.000325386 | LCK/IL7R/CD28/CD40LG/ELANE | 5 |
| GO:0042060 | BP | GO:0042060 | wound healing | 6/27 | 429/18800 | 2.69E-05 | 0.000646706 | 0.000370335 | S100A8/LCK/PRKCA/PF4/CTSG/CD40LG | 6 |
| GO:1990266 | BP | GO:1990266 | neutrophil migration | 4/27 | 128/18800 | 3.19E-05 | 0.000749218 | 0.000429038 | S100A12/S100A8/IL1R1/PF4 | 4 |
| GO:0001909 | BP | GO:0001909 | leukocyte mediated cytotoxicity | 4/27 | 131/18800 | 3.49E-05 | 0.000801803 | 0.000459151 | IL7R/CX3CR1/CTSG/ELANE | 4 |
| GO:0031295 | BP | GO:0031295 | T cell costimulation | 3/27 | 45/18800 | 3.60E-05 | 0.000808959 | 0.000463249 | LCK/CD28/CD40LG | 3 |
| GO:0031294 | BP | GO:0031294 | lymphocyte costimulation | 3/27 | 47/18800 | 4.11E-05 | 0.000902577 | 0.000516859 | LCK/CD28/CD40LG | 3 |
| GO:1902105 | BP | GO:1902105 | regulation of leukocyte differentiation | 5/27 | 283/18800 | 4.59E-05 | 0.000960907 | 0.000550262 | IL7R/PRKCA/PF4/CD28/FOS | 5 |
| GO:0070555 | BP | GO:0070555 | response to interleukin-1 | 4/27 | 141/18800 | 4.65E-05 | 0.000960907 | 0.000550262 | CAMP/IL1R2/PRKCA/IL1R1 | 4 |
| GO:0030225 | BP | GO:0030225 | macrophage differentiation | 3/27 | 49/18800 | 4.66E-05 | 0.000960907 | 0.000550262 | MMP9/PRKCA/PF4 | 3 |
| GO:0044403 | BP | GO:0044403 | biological process involved in symbiotic interaction | 5/27 | 286/18800 | 4.83E-05 | 0.000975984 | 0.000558896 | CAMP/CX3CR1/PF4/CTSG/ELANE | 5 |
| GO:0051092 | BP | GO:0051092 | positive regulation of NF-kappaB transcription factor activity | 4/27 | 154/18800 | 6.56E-05 | 0.001257781 | 0.000720266 | S100A12/S100A8/CX3CR1/CD40LG | 4 |
| GO:0097530 | BP | GO:0097530 | granulocyte migration | 4/27 | 154/18800 | 6.56E-05 | 0.001257781 | 0.000720266 | S100A12/S100A8/IL1R1/PF4 | 4 |
| GO:0002763 | BP | GO:0002763 | positive regulation of myeloid leukocyte differentiation | 3/27 | 55/18800 | 6.59E-05 | 0.001257781 | 0.000720266 | PRKCA/PF4/FOS | 3 |
| GO:1902107 | BP | GO:1902107 | positive regulation of leukocyte differentiation | 4/27 | 157/18800 | 7.07E-05 | 0.00130004 | 0.000744466 | IL7R/PRKCA/PF4/FOS | 4 |
| GO:1903708 | BP | GO:1903708 | positive regulation of hemopoiesis | 4/27 | 157/18800 | 7.07E-05 | 0.00130004 | 0.000744466 | IL7R/PRKCA/PF4/FOS | 4 |
| GO:0060326 | BP | GO:0060326 | cell chemotaxis | 5/27 | 315/18800 | 7.63E-05 | 0.001377237 | 0.000788672 | S100A12/S100A8/CX3CR1/PF4/CTSG | 5 |
| GO:2000659 | BP | GO:2000659 | regulation of interleukin-1-mediated signaling pathway | 2/27 | 10/18800 | 8.88E-05 | 0.001574172 | 0.000901447 | IL1R2/IL1R1 | 2 |
| GO:0022617 | BP | GO:0022617 | extracellular matrix disassembly | 3/27 | 62/18800 | 9.44E-05 | 0.001645828 | 0.00094248 | MMP9/CTSG/ELANE | 3 |
| GO:0070944 | BP | GO:0070944 | neutrophil-mediated killing of bacterium | 2/27 | 11/18800 | 0.000108378 | 0.001857121 | 0.001063477 | CTSG/ELANE | 2 |
| GO:0050863 | BP | GO:0050863 | regulation of T cell activation | 5/27 | 342/18800 | 0.000112362 | 0.001893292 | 0.00108419 | LCK/IL7R/CD28/CTSG/CD40LG | 5 |
| GO:0045765 | BP | GO:0045765 | regulation of angiogenesis | 5/27 | 345/18800 | 0.000117062 | 0.001940157 | 0.001111028 | CAMP/CX3CR1/PRKCA/ADM/PF4 | 5 |
| GO:1901342 | BP | GO:1901342 | regulation of vasculature development | 5/27 | 351/18800 | 0.000126916 | 0.001996545 | 0.001143318 | CAMP/CX3CR1/PRKCA/ADM/PF4 | 5 |
| GO:0045766 | BP | GO:0045766 | positive regulation of angiogenesis | 4/27 | 183/18800 | 0.000127968 | 0.001996545 | 0.001143318 | CAMP/CX3CR1/PRKCA/ADM | 4 |
| GO:1904018 | BP | GO:1904018 | positive regulation of vasculature development | 4/27 | 183/18800 | 0.000127968 | 0.001996545 | 0.001143318 | CAMP/CX3CR1/PRKCA/ADM | 4 |
| GO:0070943 | BP | GO:0070943 | neutrophil-mediated killing of symbiont cell | 2/27 | 12/18800 | 0.000129938 | 0.001996545 | 0.001143318 | CTSG/ELANE | 2 |
| GO:0002697 | BP | GO:0002697 | regulation of immune effector process | 5/27 | 353/18800 | 0.000130338 | 0.001996545 | 0.001143318 | IL7R/CX3CR1/IL1R1/CD28/CD40LG | 5 |
| GO:0002548 | BP | GO:0002548 | monocyte chemotaxis | 3/27 | 70/18800 | 0.000135619 | 0.00204643 | 0.001171884 | S100A12/CX3CR1/CTSG | 3 |
| GO:0045123 | BP | GO:0045123 | cellular extravasation | 3/27 | 73/18800 | 0.00015365 | 0.00228441 | 0.001308163 | CX3CR1/IL1R1/ELANE | 3 |
| GO:2001233 | BP | GO:2001233 | regulation of apoptotic signaling pathway | 5/27 | 370/18800 | 0.000162379 | 0.002374924 | 0.001359996 | S100A8/LCK/MMP9/CX3CR1/PF4 | 5 |
| GO:1903706 | BP | GO:1903706 | regulation of hemopoiesis | 5/27 | 371/18800 | 0.000164436 | 0.002374924 | 0.001359996 | IL7R/PRKCA/PF4/CD28/FOS | 5 |
| GO:0070942 | BP | GO:0070942 | neutrophil mediated cytotoxicity | 2/27 | 14/18800 | 0.00017884 | 0.002546583 | 0.001458296 | CTSG/ELANE | 2 |
| GO:0002573 | BP | GO:0002573 | myeloid leukocyte differentiation | 4/27 | 210/18800 | 0.000217039 | 0.003047592 | 0.001745198 | MMP9/PRKCA/PF4/FOS | 4 |
| GO:0045651 | BP | GO:0045651 | positive regulation of macrophage differentiation | 2/27 | 16/18800 | 0.000235416 | 0.003216285 | 0.0018418 | PRKCA/PF4 | 2 |
| GO:0051238 | BP | GO:0051238 | sequestering of metal ion | 2/27 | 16/18800 | 0.000235416 | 0.003216285 | 0.0018418 | S100A8/LCN2 | 2 |
| GO:0045069 | BP | GO:0045069 | regulation of viral genome replication | 3/27 | 87/18800 | 0.000258368 | 0.003482807 | 0.001994423 | SLPI/CD28/OAS1 | 3 |
| GO:0050870 | BP | GO:0050870 | positive regulation of T cell activation | 4/27 | 223/18800 | 0.000272948 | 0.003630925 | 0.002079243 | LCK/IL7R/CD28/CD40LG | 4 |
| GO:0002683 | BP | GO:0002683 | negative regulation of immune system process | 5/27 | 425/18800 | 0.000308702 | 0.004044796 | 0.002316245 | IL7R/CX3CR1/OAS1/CTSG/BPI | 5 |
| GO:0052548 | BP | GO:0052548 | regulation of endopeptidase activity | 5/27 | 426/18800 | 0.000312061 | 0.004044796 | 0.002316245 | S100A8/SLPI/LCK/MMP9/PI3 | 5 |
| GO:0002523 | BP | GO:0002523 | leukocyte migration involved in inflammatory response | 2/27 | 19/18800 | 0.000334577 | 0.004278463 | 0.002450054 | S100A8/ELANE | 2 |
| GO:0002703 | BP | GO:0002703 | regulation of leukocyte mediated immunity | 4/27 | 236/18800 | 0.000338553 | 0.004278463 | 0.002450054 | IL7R/CX3CR1/IL1R1/CD28 | 4 |
| GO:0032103 | BP | GO:0032103 | positive regulation of response to external stimulus | 5/27 | 442/18800 | 0.000369698 | 0.004614383 | 0.002642418 | S100A12/S100A8/CX3CR1/PRKCA/CD28 | 5 |
| GO:0045639 | BP | GO:0045639 | positive regulation of myeloid cell differentiation | 3/27 | 99/18800 | 0.000377966 | 0.004660046 | 0.002668567 | PRKCA/PF4/FOS | 3 |
| GO:0032760 | BP | GO:0032760 | positive regulation of tumor necrosis factor production | 3/27 | 103/18800 | 0.000424539 | 0.005132874 | 0.002939331 | ORM1/PF4/OAS1 | 3 |
| GO:0052547 | BP | GO:0052547 | regulation of peptidase activity | 5/27 | 456/18800 | 0.00042647 | 0.005132874 | 0.002939331 | S100A8/SLPI/LCK/MMP9/PI3 | 5 |
| GO:0002444 | BP | GO:0002444 | myeloid leukocyte mediated immunity | 3/27 | 104/18800 | 0.000436732 | 0.00519454 | 0.002974644 | CX3CR1/CTSG/ELANE | 3 |
| GO:0022411 | BP | GO:0022411 | cellular component disassembly | 5/27 | 460/18800 | 0.000443843 | 0.005217739 | 0.002987929 | MMP9/CX3CR1/PRKCA/CTSG/ELANE | 5 |
| GO:0030593 | BP | GO:0030593 | neutrophil chemotaxis | 3/27 | 106/18800 | 0.000461788 | 0.005366292 | 0.003072998 | S100A12/S100A8/PF4 | 3 |
| GO:1903557 | BP | GO:1903557 | positive regulation of tumor necrosis factor superfamily cytokine production | 3/27 | 107/18800 | 0.000474655 | 0.005453134 | 0.003122728 | ORM1/PF4/OAS1 | 3 |
| GO:0051091 | BP | GO:0051091 | positive regulation of DNA-binding transcription factor activity | 4/27 | 265/18800 | 0.000524616 | 0.005935936 | 0.003399203 | S100A12/S100A8/CX3CR1/CD40LG | 4 |
| GO:0071347 | BP | GO:0071347 | cellular response to interleukin-1 | 3/27 | 111/18800 | 0.000528422 | 0.005935936 | 0.003399203 | CAMP/IL1R2/IL1R1 | 3 |
| GO:0045649 | BP | GO:0045649 | regulation of macrophage differentiation | 2/27 | 24/18800 | 0.000537632 | 0.005973031 | 0.003420446 | PRKCA/PF4 | 2 |
| GO:0002526 | BP | GO:0002526 | acute inflammatory response | 3/27 | 113/18800 | 0.000556708 | 0.006117741 | 0.003503313 | ORM1/S100A8/ELANE | 3 |
| GO:0001911 | BP | GO:0001911 | negative regulation of leukocyte mediated cytotoxicity | 2/27 | 25/18800 | 0.000583865 | 0.006235724 | 0.003570877 | IL7R/CX3CR1 | 2 |
| GO:0032753 | BP | GO:0032753 | positive regulation of interleukin-4 production | 2/27 | 25/18800 | 0.000583865 | 0.006235724 | 0.003570877 | CD28/CD40LG | 2 |
| GO:0046916 | BP | GO:0046916 | cellular transition metal ion homeostasis | 3/27 | 115/18800 | 0.000585948 | 0.006235724 | 0.003570877 | S100A8/LCK/LCN2 | 3 |
| GO:0072503 | BP | GO:0072503 | cellular divalent inorganic cation homeostasis | 5/27 | 494/18800 | 0.000614062 | 0.006421985 | 0.003677538 | S100A8/LCK/CX3CR1/ADM/ELANE | 5 |
| GO:0002761 | BP | GO:0002761 | regulation of myeloid leukocyte differentiation | 3/27 | 117/18800 | 0.000616155 | 0.006421985 | 0.003677538 | PRKCA/PF4/FOS | 3 |
| GO:0032682 | BP | GO:0032682 | negative regulation of chemokine production | 2/27 | 26/18800 | 0.000631961 | 0.006519513 | 0.003733388 | OAS1/ELANE | 2 |
| GO:0002227 | BP | GO:0002227 | innate immune response in mucosa | 2/27 | 27/18800 | 0.000681913 | 0.006963783 | 0.003987798 | CAMP/RNASE3 | 2 |
| GO:0031342 | BP | GO:0031342 | negative regulation of cell killing | 2/27 | 28/18800 | 0.000733718 | 0.007344449 | 0.004205786 | IL7R/CX3CR1 | 2 |
| GO:0090330 | BP | GO:0090330 | regulation of platelet aggregation | 2/27 | 28/18800 | 0.000733718 | 0.007344449 | 0.004205786 | PRKCA/CTSG | 2 |
| GO:0050852 | BP | GO:0050852 | T cell receptor signaling pathway | 3/27 | 127/18800 | 0.000782137 | 0.007752359 | 0.004439375 | CD247/LCK/CD28 | 3 |
| GO:0071621 | BP | GO:0071621 | granulocyte chemotaxis | 3/27 | 128/18800 | 0.000800144 | 0.007853837 | 0.004497486 | S100A12/S100A8/PF4 | 3 |
| GO:0032612 | BP | GO:0032612 | interleukin-1 production | 3/27 | 129/18800 | 0.000818412 | 0.007880143 | 0.00451255 | ORM1/CX3CR1/IL1R2 | 3 |
| GO:0032652 | BP | GO:0032652 | regulation of interleukin-1 production | 3/27 | 129/18800 | 0.000818412 | 0.007880143 | 0.00451255 | ORM1/CX3CR1/IL1R2 | 3 |
| GO:0070498 | BP | GO:0070498 | interleukin-1-mediated signaling pathway | 2/27 | 30/18800 | 0.000842865 | 0.008039021 | 0.004603531 | IL1R2/IL1R1 | 2 |
| GO:0019079 | BP | GO:0019079 | viral genome replication | 3/27 | 134/18800 | 0.000913745 | 0.008633607 | 0.00494402 | SLPI/CD28/OAS1 | 3 |
| GO:0002440 | BP | GO:0002440 | production of molecular mediator of immune response | 4/27 | 312/18800 | 0.000965984 | 0.009042681 | 0.005178275 | IL1R1/CD28/CD40LG/ELANE | 4 |
| GO:0055076 | BP | GO:0055076 | transition metal ion homeostasis | 3/27 | 139/18800 | 0.001015862 | 0.009128974 | 0.005227691 | S100A8/LCK/LCN2 | 3 |
| GO:1903900 | BP | GO:1903900 | regulation of viral life cycle | 3/27 | 139/18800 | 0.001015862 | 0.009128974 | 0.005227691 | SLPI/CD28/OAS1 | 3 |
| GO:0032633 | BP | GO:0032633 | interleukin-4 production | 2/27 | 33/18800 | 0.00102035 | 0.009128974 | 0.005227691 | CD28/CD40LG | 2 |
| GO:0032673 | BP | GO:0032673 | regulation of interleukin-4 production | 2/27 | 33/18800 | 0.00102035 | 0.009128974 | 0.005227691 | CD28/CD40LG | 2 |
| GO:0050901 | BP | GO:0050901 | leukocyte tethering or rolling | 2/27 | 33/18800 | 0.00102035 | 0.009128974 | 0.005227691 | CX3CR1/ELANE | 2 |
| GO:0050729 | BP | GO:0050729 | positive regulation of inflammatory response | 3/27 | 145/18800 | 0.001147621 | 0.01000361 | 0.00572855 | S100A12/S100A8/CD28 | 3 |
| GO:0002446 | BP | GO:0002446 | neutrophil mediated immunity | 2/27 | 35/18800 | 0.001147793 | 0.01000361 | 0.00572855 | CTSG/ELANE | 2 |
| GO:0034110 | BP | GO:0034110 | regulation of homotypic cell-cell adhesion | 2/27 | 35/18800 | 0.001147793 | 0.01000361 | 0.00572855 | PRKCA/CTSG | 2 |
| GO:0071276 | BP | GO:0071276 | cellular response to cadmium ion | 2/27 | 37/18800 | 0.001282485 | 0.011081985 | 0.006346079 | MMP9/FOS | 2 |
| GO:0002385 | BP | GO:0002385 | mucosal immune response | 2/27 | 38/18800 | 0.001352537 | 0.01149088 | 0.006580232 | CAMP/RNASE3 | 2 |
| GO:0032717 | BP | GO:0032717 | negative regulation of interleukin-8 production | 2/27 | 38/18800 | 0.001352537 | 0.01149088 | 0.006580232 | BPI/ELANE | 2 |
| GO:0007189 | BP | GO:0007189 | adenylate cyclase-activating G protein-coupled receptor signaling pathway | 3/27 | 155/18800 | 0.001390366 | 0.011713832 | 0.006707905 | PRKCA/ADM/PF4 | 3 |
| GO:0002691 | BP | GO:0002691 | regulation of cellular extravasation | 2/27 | 39/18800 | 0.001424386 | 0.011803725 | 0.006759382 | IL1R1/ELANE | 2 |
| GO:0006882 | BP | GO:0006882 | cellular zinc ion homeostasis | 2/27 | 39/18800 | 0.001424386 | 0.011803725 | 0.006759382 | S100A8/LCK | 2 |
| GO:0045861 | BP | GO:0045861 | negative regulation of proteolysis | 4/27 | 350/18800 | 0.001476956 | 0.012139854 | 0.006951866 | SLPI/MMP9/IL1R2/PI3 | 4 |
| GO:0050792 | BP | GO:0050792 | regulation of viral process | 3/27 | 159/18800 | 0.001495825 | 0.012195796 | 0.006983901 | SLPI/CD28/OAS1 | 3 |
| GO:0002251 | BP | GO:0002251 | organ or tissue specific immune response | 2/27 | 41/18800 | 0.001573458 | 0.012427856 | 0.00711679 | CAMP/RNASE3 | 2 |
| GO:0032733 | BP | GO:0032733 | positive regulation of interleukin-10 production | 2/27 | 41/18800 | 0.001573458 | 0.012427856 | 0.00711679 | CD28/CD40LG | 2 |
| GO:0042119 | BP | GO:0042119 | neutrophil activation | 2/27 | 41/18800 | 0.001573458 | 0.012427856 | 0.00711679 | CAMP/CTSG | 2 |
| GO:0055069 | BP | GO:0055069 | zinc ion homeostasis | 2/27 | 41/18800 | 0.001573458 | 0.012427856 | 0.00711679 | S100A8/LCK | 2 |
| GO:0007568 | BP | GO:0007568 | aging | 3/27 | 163/18800 | 0.001606191 | 0.012588052 | 0.007208526 | ADM/RETN/FOS | 3 |
| GO:0001959 | BP | GO:0001959 | regulation of cytokine-mediated signaling pathway | 3/27 | 166/18800 | 0.001692236 | 0.013160389 | 0.007536273 | IL1R2/IL1R1/OAS1 | 3 |
| GO:0002700 | BP | GO:0002700 | regulation of production of molecular mediator of immune response | 3/27 | 167/18800 | 0.001721548 | 0.013193788 | 0.007555399 | IL1R1/CD28/CD40LG | 3 |
| GO:0002449 | BP | GO:0002449 | lymphocyte mediated immunity | 4/27 | 365/18800 | 0.001722631 | 0.013193788 | 0.007555399 | IL7R/IL1R1/CD28/CD40LG | 4 |
| GO:0002460 | BP | GO:0002460 | adaptive immune response based on somatic recombination of immune receptors built from immunoglobulin superfamily domains | 4/27 | 370/18800 | 0.001810495 | 0.013762486 | 0.007881063 | IL7R/IL1R1/CD28/CD40LG | 4 |
| GO:0051251 | BP | GO:0051251 | positive regulation of lymphocyte activation | 4/27 | 371/18800 | 0.001828436 | 0.013794366 | 0.00789932 | LCK/IL7R/CD28/CD40LG | 4 |
| GO:2001242 | BP | GO:2001242 | regulation of intrinsic apoptotic signaling pathway | 3/27 | 171/18800 | 0.001841978 | 0.013794366 | 0.00789932 | S100A8/LCK/MMP9 | 3 |
| GO:0002822 | BP | GO:0002822 | regulation of adaptive immune response based on somatic recombination of immune receptors built from immunoglobulin superfamily domains | 3/27 | 173/18800 | 0.00190412 | 0.014154895 | 0.008105776 | IL7R/IL1R1/CD28 | 3 |
| GO:0002706 | BP | GO:0002706 | regulation of lymphocyte mediated immunity | 3/27 | 175/18800 | 0.001967561 | 0.014519742 | 0.008314705 | IL7R/IL1R1/CD28 | 3 |
| GO:0030098 | BP | GO:0030098 | lymphocyte differentiation | 4/27 | 382/18800 | 0.002034046 | 0.014901599 | 0.008533374 | LCK/IL7R/CD28/CD40LG | 4 |
| GO:0036230 | BP | GO:0036230 | granulocyte activation | 2/27 | 47/18800 | 0.0020633 | 0.014913541 | 0.008540213 | CAMP/CTSG | 2 |
| GO:0060759 | BP | GO:0060759 | regulation of response to cytokine stimulus | 3/27 | 178/18800 | 0.002065179 | 0.014913541 | 0.008540213 | IL1R2/IL1R1/OAS1 | 3 |
| GO:0010543 | BP | GO:0010543 | regulation of platelet activation | 2/27 | 48/18800 | 0.002151106 | 0.015423889 | 0.008832463 | PRKCA/CTSG | 2 |
| GO:0030099 | BP | GO:0030099 | myeloid cell differentiation | 4/27 | 391/18800 | 0.002213824 | 0.015761805 | 0.00902597 | MMP9/PRKCA/PF4/FOS | 4 |
| GO:0007565 | BP | GO:0007565 | female pregnancy | 3/27 | 185/18800 | 0.002304581 | 0.016293227 | 0.009330288 | MMP9/ADM/FOS | 3 |
| GO:0002819 | BP | GO:0002819 | regulation of adaptive immune response | 3/27 | 188/18800 | 0.002412242 | 0.016792272 | 0.009616065 | IL7R/IL1R1/CD28 | 3 |
| GO:0009409 | BP | GO:0009409 | response to cold | 2/27 | 51/18800 | 0.002424997 | 0.016792272 | 0.009616065 | ADM/FOS | 2 |
| GO:0032692 | BP | GO:0032692 | negative regulation of interleukin-1 production | 2/27 | 51/18800 | 0.002424997 | 0.016792272 | 0.009616065 | CX3CR1/IL1R2 | 2 |
| GO:0002204 | BP | GO:0002204 | somatic recombination of immunoglobulin genes involved in immune response | 2/27 | 52/18800 | 0.002519768 | 0.017097221 | 0.009790693 | CD28/CD40LG | 2 |
| GO:0002208 | BP | GO:0002208 | somatic diversification of immunoglobulins involved in immune response | 2/27 | 52/18800 | 0.002519768 | 0.017097221 | 0.009790693 | CD28/CD40LG | 2 |
| GO:0045190 | BP | GO:0045190 | isotype switching | 2/27 | 52/18800 | 0.002519768 | 0.017097221 | 0.009790693 | CD28/CD40LG | 2 |
| GO:0071674 | BP | GO:0071674 | mononuclear cell migration | 3/27 | 199/18800 | 0.002833588 | 0.01909838 | 0.010936654 | S100A12/CX3CR1/CTSG | 3 |
| GO:0002696 | BP | GO:0002696 | positive regulation of leukocyte activation | 4/27 | 421/18800 | 0.002892535 | 0.019366578 | 0.011090237 | LCK/IL7R/CD28/CD40LG | 4 |
| GO:0061756 | BP | GO:0061756 | leukocyte adhesion to vascular endothelial cell | 2/27 | 56/18800 | 0.002916102 | 0.019395912 | 0.011107035 | CX3CR1/ELANE | 2 |
| GO:0045071 | BP | GO:0045071 | negative regulation of viral genome replication | 2/27 | 57/18800 | 0.003019473 | 0.019952142 | 0.011425559 | SLPI/OAS1 | 2 |
| GO:0043281 | BP | GO:0043281 | regulation of cysteine-type endopeptidase activity involved in apoptotic process | 3/27 | 204/18800 | 0.003039199 | 0.019952142 | 0.011425559 | S100A8/LCK/MMP9 | 3 |
| GO:0044703 | BP | GO:0044703 | multi-organism reproductive process | 3/27 | 205/18800 | 0.003081396 | 0.020098653 | 0.011509458 | MMP9/ADM/FOS | 3 |
| GO:1903131 | BP | GO:1903131 | mononuclear cell differentiation | 4/27 | 433/18800 | 0.003200142 | 0.020540934 | 0.01176273 | LCK/IL7R/CD28/CD40LG | 4 |
| GO:0045637 | BP | GO:0045637 | regulation of myeloid cell differentiation | 3/27 | 208/18800 | 0.003210156 | 0.020540934 | 0.01176273 | PRKCA/PF4/FOS | 3 |
| GO:0071902 | BP | GO:0071902 | positive regulation of protein serine/threonine kinase activity | 3/27 | 208/18800 | 0.003210156 | 0.020540934 | 0.01176273 | S100A12/CD40LG/ELANE | 3 |
| GO:0046686 | BP | GO:0046686 | response to cadmium ion | 2/27 | 59/18800 | 0.003231327 | 0.020546359 | 0.011765836 | MMP9/FOS | 2 |
| GO:0050867 | BP | GO:0050867 | positive regulation of cell activation | 4/27 | 436/18800 | 0.003280417 | 0.020728133 | 0.011869929 | LCK/IL7R/CD28/CD40LG | 4 |
| GO:0016447 | BP | GO:0016447 | somatic recombination of immunoglobulin gene segments | 2/27 | 60/18800 | 0.0033398 | 0.020972284 | 0.012009742 | CD28/CD40LG | 2 |
| GO:0044706 | BP | GO:0044706 | multi-multicellular organism process | 3/27 | 213/18800 | 0.003432045 | 0.021398248 | 0.012253669 | MMP9/ADM/FOS | 3 |
| GO:2001244 | BP | GO:2001244 | positive regulation of intrinsic apoptotic signaling pathway | 2/27 | 61/18800 | 0.003449965 | 0.021398248 | 0.012253669 | S100A8/LCK | 2 |
| GO:0031663 | BP | GO:0031663 | lipopolysaccharide-mediated signaling pathway | 2/27 | 62/18800 | 0.003561816 | 0.021957295 | 0.012573806 | PRKCA/BPI | 2 |
| GO:0002685 | BP | GO:0002685 | regulation of leukocyte migration | 3/27 | 218/18800 | 0.003663154 | 0.022250172 | 0.012741522 | CX3CR1/IL1R1/ELANE | 3 |
| GO:0032613 | BP | GO:0032613 | interleukin-10 production | 2/27 | 63/18800 | 0.00367535 | 0.022250172 | 0.012741522 | CD28/CD40LG | 2 |
| GO:0032653 | BP | GO:0032653 | regulation of interleukin-10 production | 2/27 | 63/18800 | 0.00367535 | 0.022250172 | 0.012741522 | CD28/CD40LG | 2 |
| GO:0051651 | BP | GO:0051651 | maintenance of location in cell | 3/27 | 219/18800 | 0.003710493 | 0.022325823 | 0.012784843 | S100A8/LCK/LCN2 | 3 |
| GO:0051090 | BP | GO:0051090 | regulation of DNA-binding transcription factor activity | 4/27 | 452/18800 | 0.003732012 | 0.022325823 | 0.012784843 | S100A12/S100A8/CX3CR1/CD40LG | 4 |
| GO:0006874 | BP | GO:0006874 | cellular calcium ion homeostasis | 4/27 | 456/18800 | 0.003851217 | 0.022903411 | 0.013115598 | LCK/CX3CR1/ADM/ELANE | 4 |
| GO:0002704 | BP | GO:0002704 | negative regulation of leukocyte mediated immunity | 2/27 | 67/18800 | 0.004146209 | 0.024513554 | 0.014037644 | IL7R/CX3CR1 | 2 |
| GO:2000116 | BP | GO:2000116 | regulation of cysteine-type endopeptidase activity | 3/27 | 229/18800 | 0.004204639 | 0.024687082 | 0.014137014 | S100A8/LCK/MMP9 | 3 |
| GO:0055074 | BP | GO:0055074 | calcium ion homeostasis | 4/27 | 468/18800 | 0.004224397 | 0.024687082 | 0.014137014 | LCK/CX3CR1/ADM/ELANE | 4 |
| GO:2001234 | BP | GO:2001234 | negative regulation of apoptotic signaling pathway | 3/27 | 230/18800 | 0.004256149 | 0.024729695 | 0.014161416 | MMP9/CX3CR1/PF4 | 3 |
| GO:0016445 | BP | GO:0016445 | somatic diversification of immunoglobulins | 2/27 | 69/18800 | 0.004391609 | 0.025084277 | 0.014364467 | CD28/CD40LG | 2 |
| GO:0032715 | BP | GO:0032715 | negative regulation of interleukin-6 production | 2/27 | 69/18800 | 0.004391609 | 0.025084277 | 0.014364467 | ORM1/BPI | 2 |
| GO:0070527 | BP | GO:0070527 | platelet aggregation | 2/27 | 69/18800 | 0.004391609 | 0.025084277 | 0.014364467 | PRKCA/CTSG | 2 |
| GO:0002562 | BP | GO:0002562 | somatic diversification of immune receptors via germline recombination within a single locus | 2/27 | 70/18800 | 0.004516786 | 0.025511007 | 0.014608833 | CD28/CD40LG | 2 |
| GO:0016444 | BP | GO:0016444 | somatic cell DNA recombination | 2/27 | 70/18800 | 0.004516786 | 0.025511007 | 0.014608833 | CD28/CD40LG | 2 |
| GO:0002764 | BP | GO:0002764 | immune response-regulating signaling pathway | 4/27 | 482/18800 | 0.004690045 | 0.026342417 | 0.015084939 | CD247/LCK/CD28/OAS1 | 4 |
| GO:0002381 | BP | GO:0002381 | immunoglobulin production involved in immunoglobulin-mediated immune response | 2/27 | 73/18800 | 0.004902164 | 0.027231249 | 0.015593927 | CD28/CD40LG | 2 |
| GO:0150076 | BP | GO:0150076 | neuroinflammatory response | 2/27 | 73/18800 | 0.004902164 | 0.027231249 | 0.015593927 | MMP9/CX3CR1 | 2 |
| GO:0007188 | BP | GO:0007188 | adenylate cyclase-modulating G protein-coupled receptor signaling pathway | 3/27 | 244/18800 | 0.005018084 | 0.027509532 | 0.015753285 | PRKCA/ADM/PF4 | 3 |
| GO:0050851 | BP | GO:0050851 | antigen receptor-mediated signaling pathway | 3/27 | 244/18800 | 0.005018084 | 0.027509532 | 0.015753285 | CD247/LCK/CD28 | 3 |
| GO:0002637 | BP | GO:0002637 | regulation of immunoglobulin production | 2/27 | 74/18800 | 0.005033891 | 0.027509532 | 0.015753285 | CD28/CD40LG | 2 |
| GO:0002437 | BP | GO:0002437 | inflammatory response to antigenic stimulus | 2/27 | 75/18800 | 0.005167244 | 0.028086471 | 0.016083668 | CD28/ELANE | 2 |
| GO:0010951 | BP | GO:0010951 | negative regulation of endopeptidase activity | 3/27 | 251/18800 | 0.005428055 | 0.029093321 | 0.016660239 | SLPI/MMP9/PI3 | 3 |
| GO:0006919 | BP | GO:0006919 | activation of cysteine-type endopeptidase activity involved in apoptotic process | 2/27 | 77/18800 | 0.005438811 | 0.029093321 | 0.016660239 | S100A8/LCK | 2 |
| GO:0032720 | BP | GO:0032720 | negative regulation of tumor necrosis factor production | 2/27 | 77/18800 | 0.005438811 | 0.029093321 | 0.016660239 | ORM1/BPI | 2 |
| GO:0033077 | BP | GO:0033077 | T cell differentiation in thymus | 2/27 | 78/18800 | 0.005577015 | 0.029675591 | 0.016993675 | IL7R/CD28 | 2 |
| GO:1903556 | BP | GO:1903556 | negative regulation of tumor necrosis factor superfamily cytokine production | 2/27 | 79/18800 | 0.005716828 | 0.030260276 | 0.017328494 | ORM1/BPI | 2 |
| GO:0002200 | BP | GO:0002200 | somatic diversification of immune receptors | 2/27 | 80/18800 | 0.005858243 | 0.030847312 | 0.017664659 | CD28/CD40LG | 2 |
| GO:0010466 | BP | GO:0010466 | negative regulation of peptidase activity | 3/27 | 262/18800 | 0.006112201 | 0.032017801 | 0.018334937 | SLPI/MMP9/PI3 | 3 |
| GO:0030217 | BP | GO:0030217 | T cell differentiation | 3/27 | 263/18800 | 0.006176844 | 0.032189633 | 0.018433337 | LCK/IL7R/CD28 | 3 |
| GO:0001910 | BP | GO:0001910 | regulation of leukocyte mediated cytotoxicity | 2/27 | 85/18800 | 0.006589214 | 0.03398824 | 0.019463306 | IL7R/CX3CR1 | 2 |
| GO:0050886 | BP | GO:0050886 | endocrine process | 2/27 | 85/18800 | 0.006589214 | 0.03398824 | 0.019463306 | RETN/CTSG | 2 |
| GO:0002312 | BP | GO:0002312 | B cell activation involved in immune response | 2/27 | 86/18800 | 0.006740155 | 0.034590336 | 0.019808095 | CD28/CD40LG | 2 |
| GO:0001960 | BP | GO:0001960 | negative regulation of cytokine-mediated signaling pathway | 2/27 | 87/18800 | 0.006892667 | 0.035194376 | 0.020153998 | IL1R2/OAS1 | 2 |
| GO:0002709 | BP | GO:0002709 | regulation of T cell mediated immunity | 2/27 | 88/18800 | 0.007046747 | 0.035800308 | 0.020500983 | IL7R/IL1R1 | 2 |
| GO:0070098 | BP | GO:0070098 | chemokine-mediated signaling pathway | 2/27 | 89/18800 | 0.00720239 | 0.03640808 | 0.020849023 | CX3CR1/PF4 | 2 |
| GO:0048525 | BP | GO:0048525 | negative regulation of viral process | 2/27 | 91/18800 | 0.007518346 | 0.037816157 | 0.021655356 | SLPI/OAS1 | 2 |
| GO:0060761 | BP | GO:0060761 | negative regulation of response to cytokine stimulus | 2/27 | 92/18800 | 0.00767865 | 0.038369046 | 0.021971967 | IL1R2/OAS1 | 2 |
| GO:0002366 | BP | GO:0002366 | leukocyte activation involved in immune response | 3/27 | 285/18800 | 0.007704171 | 0.038369046 | 0.021971967 | CX3CR1/CD28/CD40LG | 3 |
| GO:0034109 | BP | GO:0034109 | homotypic cell-cell adhesion | 2/27 | 93/18800 | 0.0078405 | 0.038856593 | 0.02225116 | PRKCA/CTSG | 2 |
| GO:0002263 | BP | GO:0002263 | cell activation involved in immune response | 3/27 | 289/18800 | 0.008003793 | 0.039280751 | 0.022494053 | CX3CR1/CD28/CD40LG | 3 |
| GO:0031349 | BP | GO:0031349 | positive regulation of defense response | 3/27 | 289/18800 | 0.008003793 | 0.039280751 | 0.022494053 | S100A12/S100A8/CD28 | 3 |
| GO:0003073 | BP | GO:0003073 | regulation of systemic arterial blood pressure | 2/27 | 95/18800 | 0.008168816 | 0.039705157 | 0.022737088 | ADM/CTSG | 2 |
| GO:0048661 | BP | GO:0048661 | positive regulation of smooth muscle cell proliferation | 2/27 | 95/18800 | 0.008168816 | 0.039705157 | 0.022737088 | MMP9/ELANE | 2 |
| GO:0097193 | BP | GO:0097193 | intrinsic apoptotic signaling pathway | 3/27 | 295/18800 | 0.008466073 | 0.040550919 | 0.023221412 | S100A8/LCK/MMP9 | 3 |
| GO:0032642 | BP | GO:0032642 | regulation of chemokine production | 2/27 | 97/18800 | 0.008503259 | 0.040550919 | 0.023221412 | OAS1/ELANE | 2 |
| GO:1990868 | BP | GO:1990868 | response to chemokine | 2/27 | 97/18800 | 0.008503259 | 0.040550919 | 0.023221412 | CX3CR1/PF4 | 2 |
| GO:1990869 | BP | GO:1990869 | cellular response to chemokine | 2/27 | 97/18800 | 0.008503259 | 0.040550919 | 0.023221412 | CX3CR1/PF4 | 2 |
| GO:0046651 | BP | GO:0046651 | lymphocyte proliferation | 3/27 | 296/18800 | 0.008544625 | 0.040556884 | 0.023224828 | IL7R/CD28/CD40LG | 3 |
| GO:0032602 | BP | GO:0032602 | chemokine production | 2/27 | 98/18800 | 0.008672767 | 0.040972746 | 0.023462971 | OAS1/ELANE | 2 |
| GO:0002429 | BP | GO:0002429 | immune response-activating cell surface receptor signaling pathway | 3/27 | 300/18800 | 0.00886316 | 0.041293338 | 0.023646557 | CD247/LCK/CD28 | 3 |
| GO:0002757 | BP | GO:0002757 | immune response-activating signal transduction | 3/27 | 300/18800 | 0.00886316 | 0.041293338 | 0.023646557 | CD247/LCK/CD28 | 3 |
| GO:0032943 | BP | GO:0032943 | mononuclear cell proliferation | 3/27 | 300/18800 | 0.00886316 | 0.041293338 | 0.023646557 | IL7R/CD28/CD40LG | 3 |
| GO:0031341 | BP | GO:0031341 | regulation of cell killing | 2/27 | 100/18800 | 0.009016335 | 0.041623355 | 0.023835541 | IL7R/CX3CR1 | 2 |
| GO:0042100 | BP | GO:0042100 | B cell proliferation | 2/27 | 100/18800 | 0.009016335 | 0.041623355 | 0.023835541 | IL7R/CD40LG | 2 |
| GO:0032677 | BP | GO:0032677 | regulation of interleukin-8 production | 2/27 | 102/18800 | 0.009365942 | 0.043040762 | 0.024647216 | BPI/ELANE | 2 |
| GO:0030198 | BP | GO:0030198 | extracellular matrix organization | 3/27 | 307/18800 | 0.009437322 | 0.043071307 | 0.024664708 | MMP9/CTSG/ELANE | 3 |
| GO:0043062 | BP | GO:0043062 | extracellular structure organization | 3/27 | 308/18800 | 0.009521091 | 0.043071307 | 0.024664708 | MMP9/CTSG/ELANE | 3 |
| GO:0032637 | BP | GO:0032637 | interleukin-8 production | 2/27 | 103/18800 | 0.009543 | 0.043071307 | 0.024664708 | BPI/ELANE | 2 |
| GO:0042102 | BP | GO:0042102 | positive regulation of T cell proliferation | 2/27 | 103/18800 | 0.009543 | 0.043071307 | 0.024664708 | CD28/CD40LG | 2 |
| GO:0009416 | BP | GO:0009416 | response to light stimulus | 3/27 | 310/18800 | 0.009689945 | 0.043347498 | 0.024822868 | MMP9/FOS/ELANE | 3 |
| GO:0045229 | BP | GO:0045229 | external encapsulating structure organization | 3/27 | 310/18800 | 0.009689945 | 0.043347498 | 0.024822868 | MMP9/CTSG/ELANE | 3 |
| GO:0007631 | BP | GO:0007631 | feeding behavior | 2/27 | 106/18800 | 0.010083136 | 0.044710746 | 0.02560353 | RETN/FOS | 2 |
| GO:0042116 | BP | GO:0042116 | macrophage activation | 2/27 | 106/18800 | 0.010083136 | 0.044710746 | 0.02560353 | CX3CR1/BPI | 2 |
| GO:0019058 | BP | GO:0019058 | viral life cycle | 3/27 | 317/18800 | 0.010294789 | 0.045449918 | 0.026026816 | SLPI/CD28/OAS1 | 3 |
| GO:0002824 | BP | GO:0002824 | positive regulation of adaptive immune response based on somatic recombination of immune receptors built from immunoglobulin superfamily domains | 2/27 | 110/18800 | 0.01082407 | 0.047168685 | 0.027011065 | IL1R1/CD28 | 2 |
| GO:0032611 | BP | GO:0032611 | interleukin-1 beta production | 2/27 | 110/18800 | 0.01082407 | 0.047168685 | 0.027011065 | ORM1/CX3CR1 | 2 |
| GO:0032651 | BP | GO:0032651 | regulation of interleukin-1 beta production | 2/27 | 110/18800 | 0.01082407 | 0.047168685 | 0.027011065 | ORM1/CX3CR1 | 2 |
| GO:0006310 | BP | GO:0006310 | DNA recombination | 3/27 | 324/18800 | 0.010921308 | 0.047388163 | 0.027136748 | IL7R/CD28/CD40LG | 3 |
| GO:0007204 | BP | GO:0007204 | positive regulation of cytosolic calcium ion concentration | 3/27 | 325/18800 | 0.011012589 | 0.04758003 | 0.027246621 | LCK/CX3CR1/ADM | 3 |
| GO:0002456 | BP | GO:0002456 | T cell mediated immunity | 2/27 | 112/18800 | 0.011203355 | 0.047994032 | 0.027483698 | IL7R/IL1R1 | 2 |
| GO:0002698 | BP | GO:0002698 | negative regulation of immune effector process | 2/27 | 112/18800 | 0.011203355 | 0.047994032 | 0.027483698 | IL7R/CX3CR1 | 2 |
| GO:0002768 | BP | GO:0002768 | immune response-regulating cell surface receptor signaling pathway | 3/27 | 328/18800 | 0.011289109 | 0.048157339 | 0.027577215 | CD247/LCK/CD28 | 3 |
| GO:0070661 | BP | GO:0070661 | leukocyte proliferation | 3/27 | 330/18800 | 0.011475691 | 0.048747578 | 0.027915215 | IL7R/CD28/CD40LG | 3 |
| GO:0051235 | BP | GO:0051235 | maintenance of location | 3/27 | 331/18800 | 0.011569654 | 0.048941087 | 0.028026027 | S100A8/LCK/LCN2 | 3 |
| GO:0002821 | BP | GO:0002821 | positive regulation of adaptive immune response | 2/27 | 115/18800 | 0.011783206 | 0.049636756 | 0.028424401 | IL1R1/CD28 | 2 |
| GO:0034774 | CC | GO:0034774 | secretory granule lumen | 12/27 | 322/19594 | 4.41E-15 | 9.19E-14 | 5.95E-14 | S100A12/ORM1/S100A8/SLPI/CAMP/RNASE3/PF4/RETN/CTSG/BPI/LCN2/ELANE | 12 |
| GO:0060205 | CC | GO:0060205 | cytoplasmic vesicle lumen | 12/27 | 325/19594 | 4.93E-15 | 9.19E-14 | 5.95E-14 | S100A12/ORM1/S100A8/SLPI/CAMP/RNASE3/PF4/RETN/CTSG/BPI/LCN2/ELANE | 12 |
| GO:0031983 | CC | GO:0031983 | vesicle lumen | 12/27 | 327/19594 | 5.30E-15 | 9.19E-14 | 5.95E-14 | S100A12/ORM1/S100A8/SLPI/CAMP/RNASE3/PF4/RETN/CTSG/BPI/LCN2/ELANE | 12 |
| GO:0035580 | CC | GO:0035580 | specific granule lumen | 7/27 | 62/19594 | 1.89E-12 | 2.46E-11 | 1.59E-11 | ORM1/SLPI/CAMP/RETN/BPI/LCN2/ELANE | 7 |
| GO:0042581 | CC | GO:0042581 | specific granule | 7/27 | 160/19594 | 1.64E-09 | 1.71E-08 | 1.11E-08 | ORM1/SLPI/CAMP/RETN/BPI/LCN2/ELANE | 7 |
| GO:0035578 | CC | GO:0035578 | azurophil granule lumen | 5/27 | 91/19594 | 1.44E-07 | 1.25E-06 | 8.08E-07 | RNASE3/RETN/CTSG/BPI/ELANE | 5 |
| GO:0062023 | CC | GO:0062023 | collagen-containing extracellular matrix | 7/27 | 429/19594 | 1.40E-06 | 1.04E-05 | 6.72E-06 | ORM1/S100A8/SLPI/MMP9/PF4/CTSG/ELANE | 7 |
| GO:0005766 | CC | GO:0005766 | primary lysosome | 5/27 | 155/19594 | 2.04E-06 | 1.18E-05 | 7.62E-06 | RNASE3/RETN/CTSG/BPI/ELANE | 5 |
| GO:0042582 | CC | GO:0042582 | azurophil granule | 5/27 | 155/19594 | 2.04E-06 | 1.18E-05 | 7.62E-06 | RNASE3/RETN/CTSG/BPI/ELANE | 5 |
| GO:0005775 | CC | GO:0005775 | vacuolar lumen | 5/27 | 174/19594 | 3.59E-06 | 1.87E-05 | 1.21E-05 | RNASE3/RETN/CTSG/BPI/ELANE | 5 |
| GO:0009897 | CC | GO:0009897 | external side of plasma membrane | 6/27 | 455/19594 | 2.97E-05 | 0.000140259 | 9.09E-05 | IL7R/IL2RB/CX3CR1/IL1R1/CD28/CD40LG | 6 |
| GO:1904724 | CC | GO:1904724 | tertiary granule lumen | 3/27 | 55/19594 | 5.84E-05 | 0.000252889 | 0.000163815 | ORM1/MMP9/CAMP | 3 |
| GO:0070820 | CC | GO:0070820 | tertiary granule | 3/27 | 164/19594 | 0.001452808 | 0.005811233 | 0.003764361 | ORM1/MMP9/CAMP | 3 |
| GO:0001772 | CC | GO:0001772 | immunological synapse | 2/27 | 44/19594 | 0.001669178 | 0.006199803 | 0.004016067 | LCK/CD28 | 2 |
| GO:0031093 | CC | GO:0031093 | platelet alpha granule lumen | 2/27 | 67/19594 | 0.003825872 | 0.013263022 | 0.008591431 | ORM1/PF4 | 2 |
| GO:0031091 | CC | GO:0031091 | platelet alpha granule | 2/27 | 91/19594 | 0.0069434 | 0.02256605 | 0.014617684 | ORM1/PF4 | 2 |
| GO:0042105 | CC | GO:0042105 | alpha-beta T cell receptor complex | 1/27 | 11/19594 | 0.015057514 | 0.046058277 | 0.029835321 | CD247 | 1 |
| GO:0004896 | MF | GO:0004896 | cytokine receptor activity | 5/27 | 97/18410 | 2.69E-07 | 3.15E-05 | 1.73E-05 | IL7R/IL2RB/CX3CR1/IL1R2/IL1R1 | 5 |
| GO:0019955 | MF | GO:0019955 | cytokine binding | 5/27 | 141/18410 | 1.73E-06 | 8.57E-05 | 4.70E-05 | IL2RB/CX3CR1/IL1R2/IL1R1/ELANE | 5 |
| GO:0140375 | MF | GO:0140375 | immune receptor activity | 5/27 | 148/18410 | 2.20E-06 | 8.57E-05 | 4.70E-05 | IL7R/IL2RB/CX3CR1/IL1R2/IL1R1 | 5 |
| GO:0001530 | MF | GO:0001530 | lipopolysaccharide binding | 3/27 | 34/18410 | 1.63E-05 | 0.000477679 | 0.000262154 | CAMP/RNASE3/BPI | 3 |
| GO:0002020 | MF | GO:0002020 | protease binding | 4/27 | 136/18410 | 4.38E-05 | 0.001025417 | 0.000562757 | IL1R1/CD28/CTSG/ELANE | 4 |
| GO:0050786 | MF | GO:0050786 | RAGE receptor binding | 2/27 | 10/18410 | 9.25E-05 | 0.001804488 | 0.000990317 | S100A12/S100A8 | 2 |
| GO:0048018 | MF | GO:0048018 | receptor ligand activity | 5/27 | 489/18410 | 0.000644629 | 0.010054084 | 0.005517761 | ADM/PF4/RETN/CTSG/CD40LG | 5 |
| GO:0030546 | MF | GO:0030546 | signaling receptor activator activity | 5/27 | 496/18410 | 0.000687459 | 0.010054084 | 0.005517761 | ADM/PF4/RETN/CTSG/CD40LG | 5 |
| GO:0019838 | MF | GO:0019838 | growth factor binding | 3/27 | 139/18410 | 0.001078829 | 0.014024783 | 0.007696912 | IL2RB/IL1R2/IL1R1 | 3 |
| GO:0008201 | MF | GO:0008201 | heparin binding | 3/27 | 168/18410 | 0.001858634 | 0.021746017 | 0.011934386 | PF4/CTSG/ELANE | 3 |
| GO:0004252 | MF | GO:0004252 | serine-type endopeptidase activity | 3/27 | 174/18410 | 0.002054209 | 0.021849314 | 0.011991076 | MMP9/CTSG/ELANE | 3 |
| GO:0008236 | MF | GO:0008236 | serine-type peptidase activity | 3/27 | 191/18410 | 0.002676562 | 0.025543062 | 0.014018235 | MMP9/CTSG/ELANE | 3 |
| GO:0017171 | MF | GO:0017171 | serine hydrolase activity | 3/27 | 195/18410 | 0.002838118 | 0.025543062 | 0.014018235 | MMP9/CTSG/ELANE | 3 |
| GO:0005539 | MF | GO:0005539 | glycosaminoglycan binding | 3/27 | 234/18410 | 0.004733812 | 0.037722287 | 0.02070229 | PF4/CTSG/ELANE | 3 |
| GO:0042379 | MF | GO:0042379 | chemokine receptor binding | 2/27 | 71/18410 | 0.004836191 | 0.037722287 | 0.02070229 | CX3CR1/PF4 | 2 |
| GO:1901681 | MF | GO:1901681 | sulfur compound binding | 3/27 | 267/18410 | 0.006821102 | 0.04665743 | 0.025605967 | PF4/CTSG/ELANE | 3 |
| GO:0048306 | MF | GO:0048306 | calcium-dependent protein binding | 2/27 | 87/18410 | 0.007176392 | 0.04665743 | 0.025605967 | S100A12/S100A8 | 2 |
| GO:0005126 | MF | GO:0005126 | cytokine receptor binding | 3/27 | 272/18410 | 0.007178066 | 0.04665743 | 0.025605967 | CX3CR1/PF4/CD40LG | 3 |

Figure S1: Pathways with significant effects.


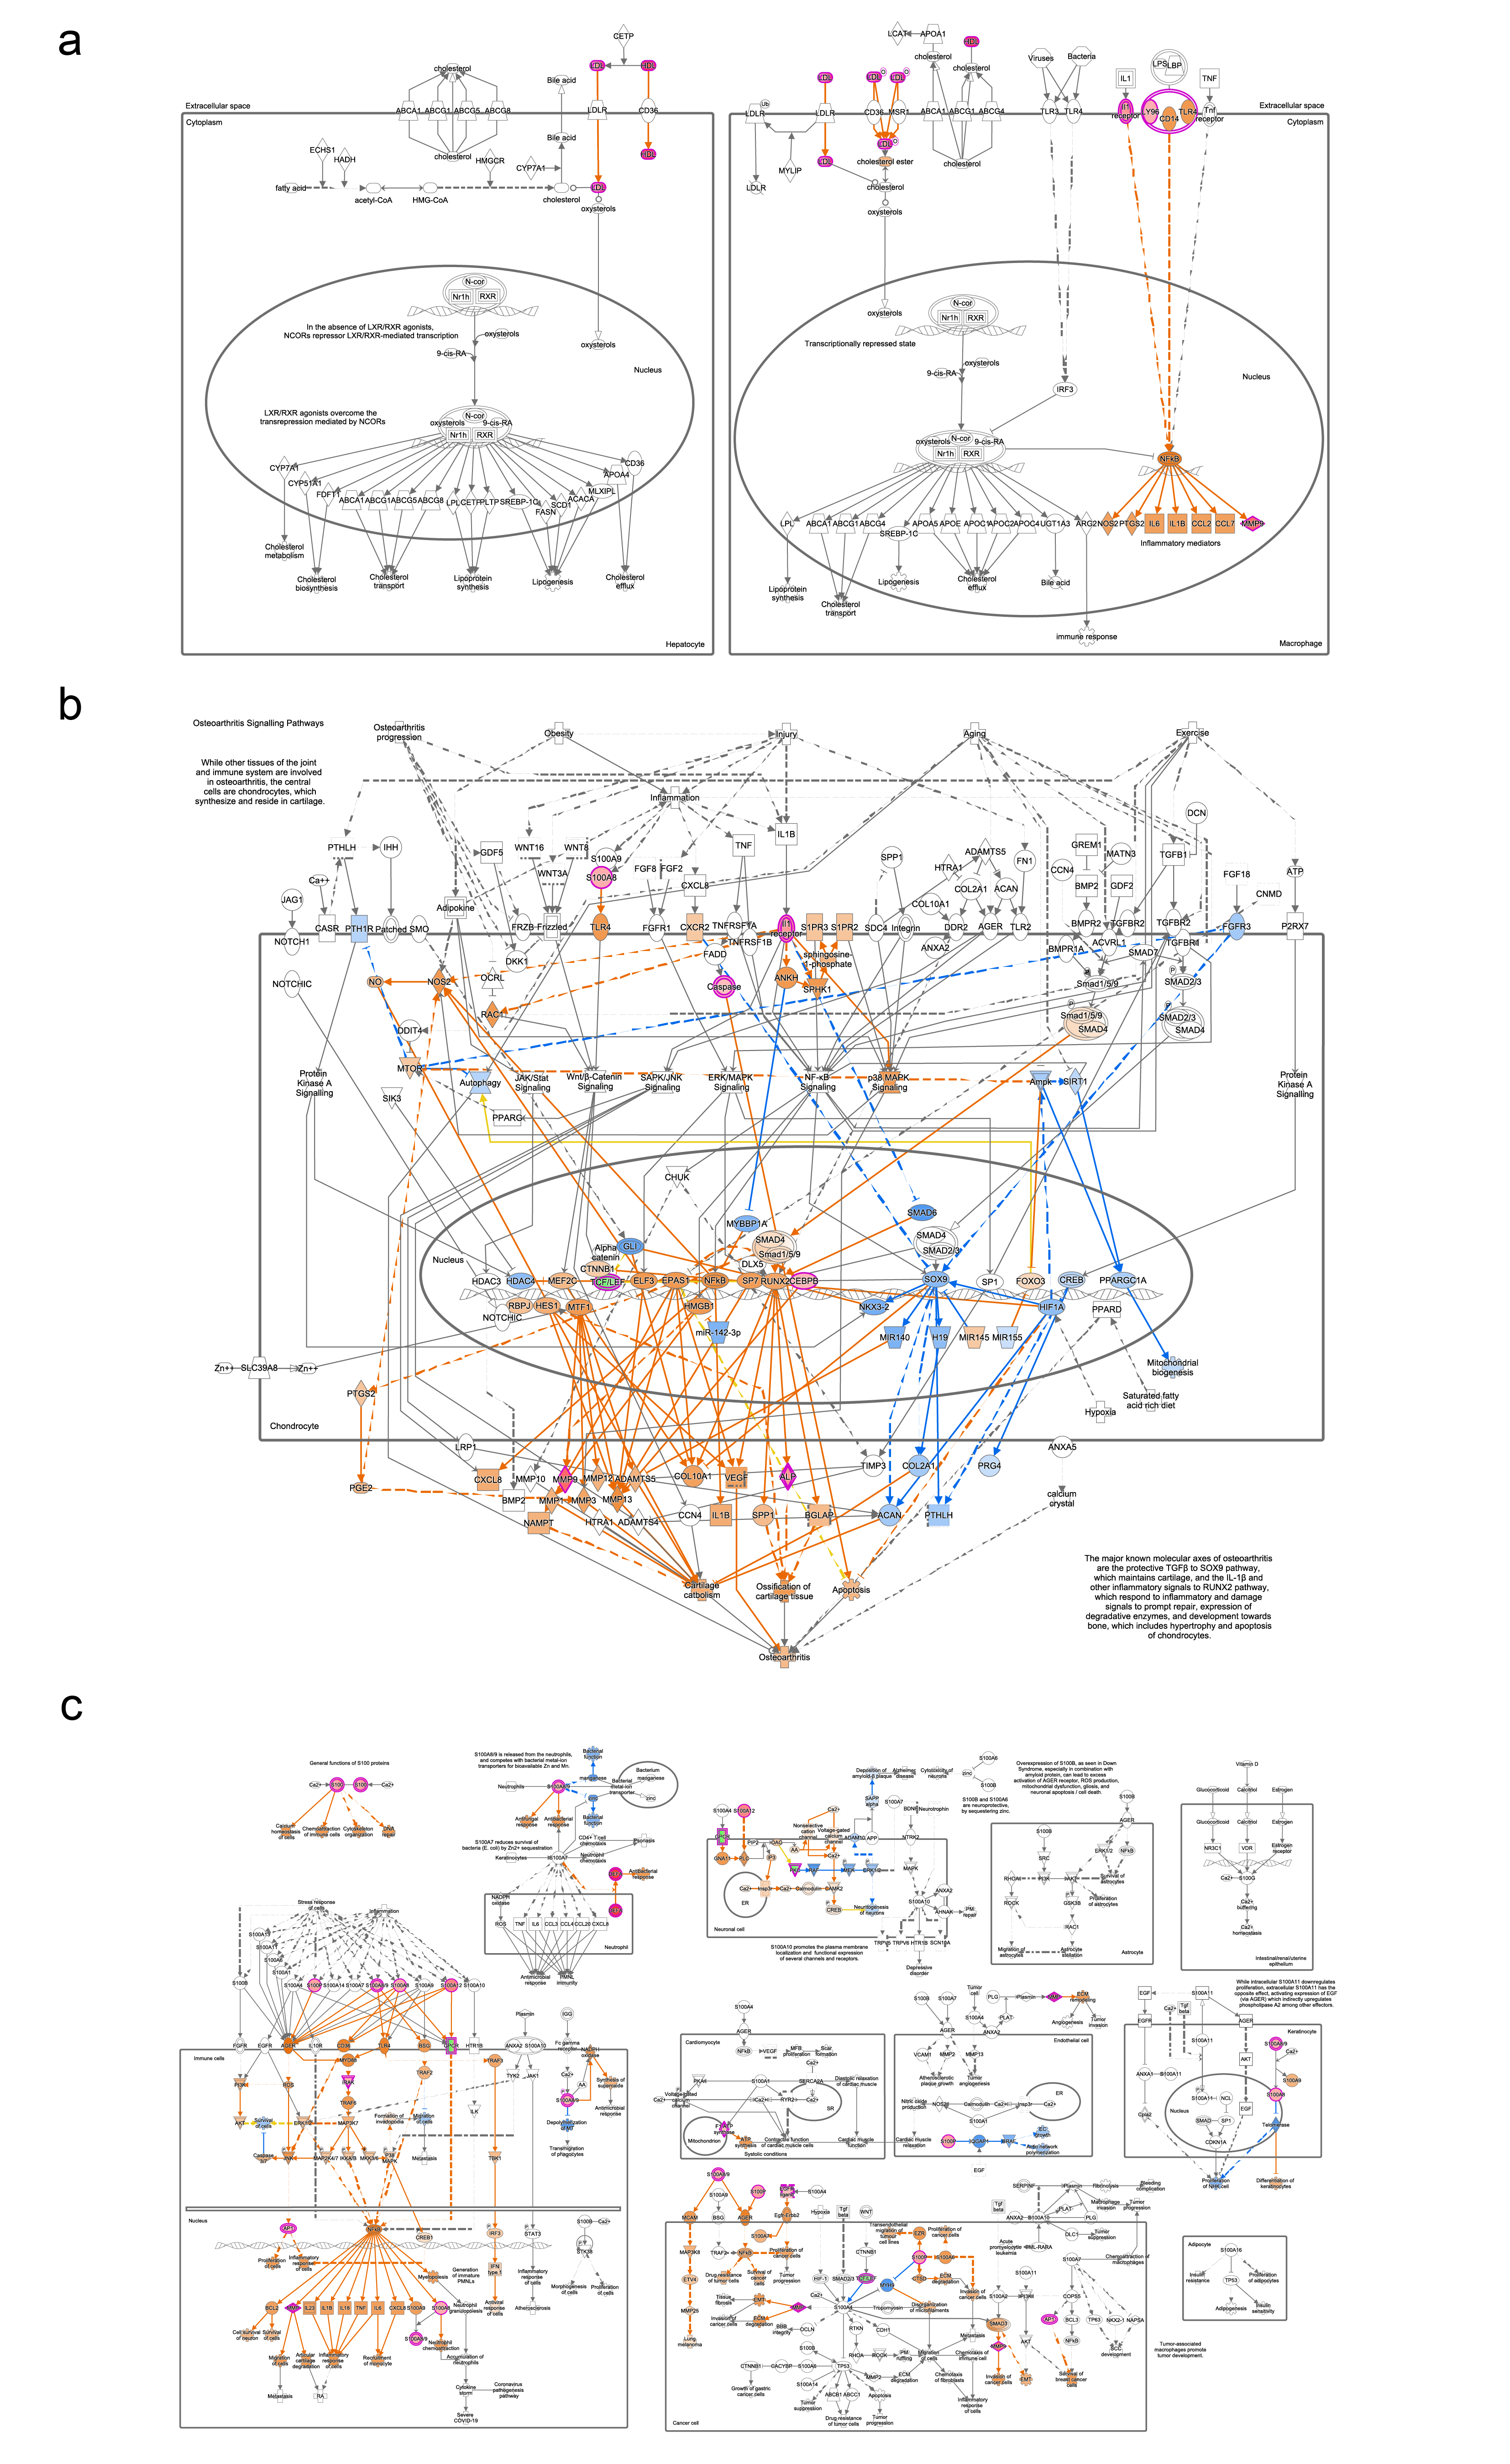

Supplement: Supplementary file 1 [file get_supplementary_file.php]
